# Supplementary material for: Fibre type‐ and localisation‐specific muscle glycogen utilisation during repeated high‐intensity intermittent exercise
Source: PubMed Central journal article supplement — J Physiol. 2022 Sep 18;600(21):4713–30. doi: 10.1113/JP283225 (PMC9825866; doi:10.1113/jp283225), 2022-09-18
Supplement: TJP-600-4713-s004.pdf [file TJP-600-4713-s004.pdf]

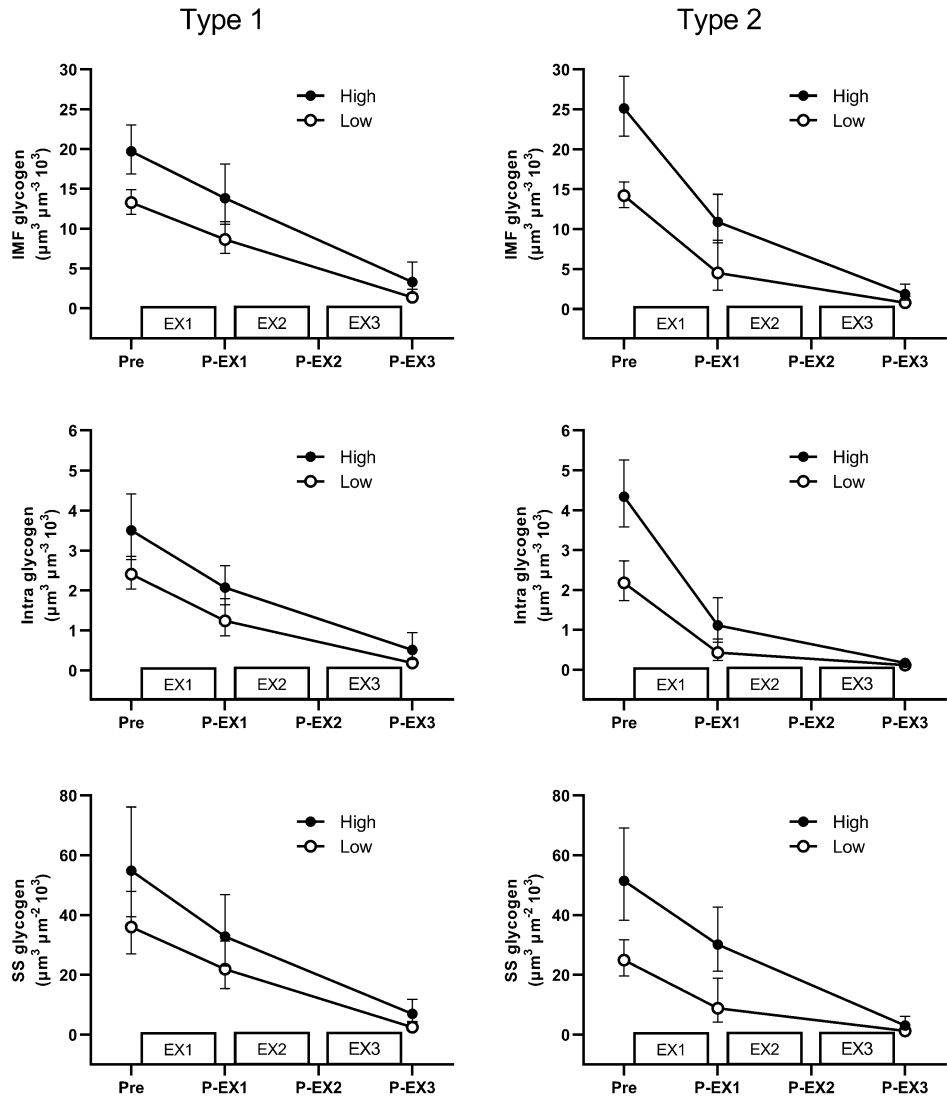

**Supplementary figure 1.** Utilisation of fibre type-specific subcellular glycogen in type 1 fibres (left panel) and type 2 fibres (right panel) in the participants divided in high and low tertiles based on the muscle glycogen content measured biochemically at baseline (n=6 in each tertile). Data are presented as geometric means and 95% CI.
